# Supplementary material
Source: PubMed Central journal article supplement (PMC9748356)
Supplement: mmc1.pdf [file mmc1.pdf]

**The American Journal of Human Genetics, Volume 109**

**Supplemental information**

**Understanding changes in genetic literacy over  
time and in genetic research participants**

**India D. Little, Laura M. Koehly, and Chris Gunter**

**Table S1.** Mean(SD) of familiarity with each genetic term on scale from 1 (not at all familiar) to 7 (completely familiar).

| <b>Genetic Term</b> | <b>2013 GP</b> | <b>2021 GP</b> | <b>SPARK</b> |
|---------------------|----------------|----------------|--------------|
| Genetic             | 5.48(1.83)     | 5.87(1.47)     | 6.26(1.2)    |
| Chromosome          | 4.97(2.01)     | 5.50(1.66)     | 5.94(1.41)   |
| Susceptibility      | 4.50(2.27)     | 4.97(1.98)     | 5.52(1.78)   |
| Mutation            | 4.99(2.07)     | 5.59 (1.68)    | 5.99(1.46)   |
| Variation           | 4.67(2.24)     | 5.30(1.84)     | 5.74(1.6)    |
| Abnormality         | 5.27(2.04)     | 5.65(1.66)     | 6.10(1.34)   |
| Genome              | —              | 4.29 (2.06)    | 5.00(1.87)   |
| Heredity            | 5.51(1.90)     | 5.71(1.67)     | 6.27(1.28)   |
| Sporadic            | 4.12(2.37)     | 4.62(2.15)     | 5.31(2)      |

**Table S2.** Proportion of the sample that correctly responded to each of six skills questions.

| <b>Skills Item</b>            | <b>2021 GP</b> | <b>SPARK</b> |
|-------------------------------|----------------|--------------|
| Question 1 (Genetic Testing)  | 0.18           | 0.43*        |
| Question 2 (Mutations)        | 0.65           | 0.77*        |
| Question 3 (Positive Results) | 0.38           | 0.45*        |
| Question 4 (Negative Results) | 0.28           | 0.39*        |
| Question 5 (Inheritance)      | 0.53           | 0.69*        |
| Question 6 (De Novo Variant)  | 0.64           | 0.83*        |

\*Significantly higher than 2021 GP,  $p < .001$

Table S3. Proportion of each sample that correctly responded to each statement.

| Knowledge Statement                                                                           | 2013 GP | 2021 GP | SPARK |
|-----------------------------------------------------------------------------------------------|---------|---------|-------|
| <b>One can see genes with the naked eye.*</b>                                                 | 0.79    | 0.77    | 0.89  |
| Healthy parents can have a child with a genetic disease.                                      | 0.81    | 0.81    | 0.95  |
| The onset of certain diseases is due to genes, environment, and lifestyle.                    | 0.72    | 0.69    | 0.9   |
| <b>A gene is a disease.</b>                                                                   | 0.84    | 0.83    | 0.95  |
| The carrier of a disease gene may be completely healthy.                                      | 0.75    | 0.73    | 0.9   |
| <b>All serious diseases are hereditary.</b>                                                   | 0.76    | 0.71    | 0.87  |
| A gene is a molecule that controls hereditary characteristics.                                | 0.59    | 0.68    | 0.59  |
| Genes are inside cells.                                                                       | 0.54    | 0.60    | 0.7   |
| <b>The child of a disease gene carrier is always also a carrier of the same disease gene.</b> | 0.49    | 0.44    | 0.63  |
| A gene is a piece of DNA.                                                                     | 0.66    | 0.75    | 0.77  |
| <b>A gene is a cell.</b>                                                                      | 0.38    | 0.38    | 0.57  |
| A gene is a part of a chromosome.                                                             | 0.42    | 0.59    | 0.66  |
| Different body parts include different genes.                                                 | 0.32    | 0.32    | 0.38  |
| <b>Genes are bigger than chromosomes.</b>                                                     | 0.25    | 0.31    | 0.45  |
| <b>The genome is not susceptible to human intervention.</b>                                   | 0.08    | 0.17    | 0.07  |
| It has been estimated that a person has about 22,000 genes.                                   | 0.13    | 0.28    | 0.28  |
| <b>Environmental factors, such as UV radiation, do not play a role in our genome.+</b>        | —       | 0.48    | 0.61  |

\***Bolded** statements intentionally false.

+Included only in survey completed by 2021 GP and SPARK.

**Table S4.** Six questions and response choices included in the skills module. The correct response(s) is in bold.

|                                                                                                                                                                                              |                                                                                                                                                                                                                                                                                                                                  |
|----------------------------------------------------------------------------------------------------------------------------------------------------------------------------------------------|----------------------------------------------------------------------------------------------------------------------------------------------------------------------------------------------------------------------------------------------------------------------------------------------------------------------------------|
| <p>Question 1: <i>What is the purpose of genetic testing for autism spectrum disorder? Select all that apply.</i></p>                                                                        | <ol style="list-style-type: none"> <li>1. <b>Genetic testing can provide the family or clinicians with an explanation for the diagnosis.</b></li> <li>2. <b>Genetic testing can confirm an ASD diagnosis.</b></li> <li>3. <b>Genetic testing uses DNA analysis to find any genetic mutations associated with ASD.</b></li> </ol> |
| <p>Question 2: <i>Please select the phrase that best completes the following statement: Genetic mutations that could increase a person's risk of autism spectrum disorder...</i></p>         | <ol style="list-style-type: none"> <li>1. <b>Can each convey different amounts of risk.</b></li> <li>2. Are always identical between siblings.</li> <li>3. Not sure.</li> </ol>                                                                                                                                                  |
| <p>Question 3: <i>About what percentage of individuals <b>who receive genetic testing</b> are found to have a variant associated with a higher risk for autism spectrum disorder?</i></p>    | <p>Enter a number from 0–100:<br/><b>25 %</b></p>                                                                                                                                                                                                                                                                                |
| <p>Question 4: <i>Out of 100 individuals <b>who receive genetic testing</b>, about how many will receive results with no genetic mutations associated with autism spectrum disorder?</i></p> | <p>Enter a number from 0–100:<br/><b>75</b></p>                                                                                                                                                                                                                                                                                  |
| <p>Question 5: <i>If neither the mother nor the father has ASD, it is <b>impossible</b> for their child to have ASD.</i></p>                                                                 | <ol style="list-style-type: none"> <li>1. Not Sure</li> <li>2. True</li> <li>3. <b>False</b></li> </ol>                                                                                                                                                                                                                          |
| <p>Question 6: <i>It is possible for a child to have a genetic mutation increasing their risk for ASD that <b>neither</b> their biological mother <b>nor</b> father have.</i></p>            | <ol style="list-style-type: none"> <li>1. Not Sure</li> <li>2. <b>True</b></li> <li>3. False</li> </ol>                                                                                                                                                                                                                          |
